# Supplementary material for: Detailed Transcriptome Description of the Neglected Cestode Taenia multiceps
Source: PLoS One. 2012 Sep 25;7(9):e45830. doi: 10.1371/journal.pone.0045830 (PMC3458062; doi:10.1371/journal.pone.0045830)
Supplement: Table S2 — The 30 most abundant Pfam domains/families in T. multiceps unigenes. (XLS) [file pone.0045830.s004.xls]

## Sheet: Sheet1
Table S2. The 30 most abundant Pfam domains/families in T. multiceps
Pfam accession	Pfam domains/families	No. of unigenes
PF00069.19	Pkinase	327
PF00400.26	WD40	205
PF00076.16	RRM_1	197
PF00012.14	HSP70	99
PF12796.1	Ank_2	88
PF07714.1	Pkinase_Tyr	83
PF00270.23	DEAD	74
PF00595.18	PDZ	69
PF00071.16	Ras	63
PF00096.20	zf-C2H2	61
PF00271.25	Helicase_C	60
PF12799.1	LRR_4	57
PF04825.7	Rad21_Rec8_N	56
PF00443.23	UCH	54
PF00153.21	Mito_carr	54
PF00102.21	Y_phosphatase	51
PF00091.19	Tubulin	51
PF07690.10	MFS_1	48
PF00620.21	RhoGAP	47
PF00179.1	UQ_con	46
PF01221.12	Dynein_light	46
PF00248.15	Aldo_ket_red	45
PF00041.15	fn3	43
PF07679.10	I-set	41
PF00017.18	SH2	41
PF00651.25	BTB	39
PF00566.12	TBC	38
PF00632.19	HECT	38
PF00225.17	Kinesin	37
PF00022.13	Actin	37
